## **Title: Can pornography be addictive? An fMRI study of men seeking treatment for problematic pornography use.**

### **Authors:**

Mateusz Gola<sup>1,2</sup> PhD, Małgorzata Wordecha<sup>3</sup>, Guillaume Sescousse<sup>4</sup> PhD, Michał Lew-Starowicz<sup>5</sup> MD, PhD, Bartosz Kossowski<sup>3</sup> MSc, Marek Wypych<sup>3</sup> PhD, Scott Makeig<sup>1</sup> PhD, Marc N. Potenza<sup>6,7</sup> MD, PhD, Artur Marchewka<sup>3</sup> PhD.

### **Affiliations:**

<sup>1</sup> Swartz Center for Computational Neuroscience, Institute for Neural Computations, University of California San Diego, San Diego, USA

<sup>2</sup> Institute of Psychology, Polish Academy of Sciences, Warsaw, Poland

<sup>3</sup> Laboratory of Brain Imaging, Neurobiology Center, Nencki Institute of Experimental Biology of Polish Academy of Sciences, Warsaw, Poland

<sup>4</sup> Radboud University, Donders Institute for Brain, Cognition and Behavior, Nijmegen, Netherlands

<sup>5</sup> III Department of Psychiatry, Institute of Psychiatry and Neurology, Warsaw, Poland

<sup>6</sup> Departments of Psychiatry and Neurobiology, Child Study Center and the National Center on Addiction and Substance Abuse, Yale School of Medicine, New Haven, CT, USA

<sup>7</sup> Connecticut Mental Health Center, New Haven, CT, USA

**Corresponding Author :** Mateusz Gola, PhD,

Swartz Center for Computational Neuroscience, Institute for Neural Computations, University of California San Diego, 9500 Gilman Drive, San Diego CA 92093-0559

e-mail: [mgola@ucsd.edu](mailto:mgola@ucsd.edu)

phone: +1 858 500 2554

office phone: +1 858 822 7543

Number of words: 3462

Number of figures: 3

Number of tables: 1

Supplementary files: 1

## **Abstract**

### **Importance**

Pornography consumption is highly prevalent, particularly among young adult males. For some individuals, problematic pornography use (PPU) is a reason for seeking treatment. Despite the pervasiveness of pornography, PPU appears under-investigated and basic questions remain unanswered.

### **Objective**

To investigate the neural mechanisms underlying PPU in men.

### **Design and participants**

Using functional magnetic resonance imaging (fMRI), we examined brain reactivity towards erotic and monetary stimuli, disentangling cue-related 'wanting' from reward-related 'liking' among 28 heterosexual males seeking treatment for PPU and 24 heterosexual males without PPU. Subjects could have won either erotic pictures or monetary gains in an incentive delay task, where rewards were preceded by predictive cues.

### **Main outcome measures**

BOLD signal activity relating to responses to erotic and monetary cue processing and measured during fMRI was analyzed and examined with respect to self-reported data on sexual activity collected over the 2 preceding months.

### **Results**

Men with and without PPU differed in brain reactions to cues predicting erotic pictures, but not in reactions to erotic pictures themselves, consistent with the incentive salience theory of addictions. PPU subjects showed increased activation of a brain reward region (the ventral striatum) specifically

for cues predicting erotic pictures but not for cues predicting monetary gains. This brain activation was accompanied by increased behavioral motivation to view erotic images (higher 'wanting'). Ventral striatal reactivity for cues predicting erotic pictures was significantly related to the severity of PPU, amount of pornography use per week and number of weekly masturbations.

### **Conclusions and relevance**

Our findings suggest that like in substance-use and gambling disorders the neural and behavioral mechanisms linked to anticipatory processing of cues relate importantly to clinically relevant features of PPU. These findings suggest that PPU may represent a behavioral addiction and that interventions helpful in targeting behavioral and substance addictions warrant consideration for adaptation and use in helping men with PPU.

## Introduction

Pornography consumption has become highly prevalent in part given Internet availability<sup>1</sup>. Approximately 70% of males and 20% of females aged 18-30 years use pornography weekly<sup>2</sup>. Among teenagers less than 18 years of age, 90% of boys and 60% of girls have used Internet pornography<sup>3</sup>, with 12% of children having onset of regular consumption below age 12<sup>4</sup>. For most people, pornography viewing is a form of entertainment, but for some individuals problematic pornography use (PPU) accompanied by excessive masturbation promotes seeking of treatment<sup>5</sup>. Such observations raise multiple scientifically and clinically important questions, including with respect to brain mechanisms related to PPU and their relationships to clinically relevant measures. Given the negative health measures associated with compulsive sexual behavior (CSB) broadly (e.g., childhood sexual trauma and post-traumatic stress disorder<sup>6</sup>), more research is needed in order to better understand specific forms of CSB like PPU and develop improved intervention strategies<sup>7-10</sup>.

The existence and clinical utility of non-substance or behavioral addictions has been debated, with gambling disorder currently being the sole non-substance disorder classified together with substance-use disorders in DSM-5<sup>11,12</sup>. Although a field trial for hypersexual disorder<sup>13</sup> was conducted, neither this condition or related behaviors such as PPU were included in DSM-5, in part given the relative paucity of data on these behaviors or conditions<sup>8,14,15</sup>. Whether excessive and problematic patterns of sexual behavior are best conceptualized within obsessive-compulsive-disorder (OCD), impulse-control-disorder (ICD), behavioral-addiction or other frameworks has been debated<sup>7-10</sup>. A recent case series reported that low dose (20 mg/day) of paroxetine treatment (found to be successful in treating OCD<sup>16</sup>) led to reductions in anxiety and severity of PPU<sup>17</sup>. Naltrexone treatment (found to be successful in alcohol-use<sup>18</sup> and gambling disorders<sup>19</sup>) may be helpful for individuals with PPU<sup>20,21</sup>. As naltrexone has been proposed to reduce craving through modulating activity in mesolimbic structures<sup>22</sup>, the ventral striatum may contribute importantly to compulsive sexual behaviors including PPU. Recent MRI studies of men support this hypothesis. Among non-

problematic pornography users, an inverse relationship between right caudate volume and frequency of pornography consumption was observed<sup>23</sup>. Increased blood-oxygen-level-dependent (BOLD) responses in the ventral striatum were observed in response to preferred sexual pictures when compared to non-preferred ones, and this activity positively correlated with scores on the Internet Addiction Test Modified for Cybersex<sup>24</sup>. Men with CSB (meeting criteria for hypersexual disorder)<sup>13</sup> as compared to those without (comparison subjects; CSubs) demonstrated an increased striatal reactivity for sexually explicit videos<sup>25</sup> and decreased functional connectivity between the ventral striatum and prefrontal cortex<sup>26</sup>. These findings suggest similarities between CSB and addictions.

A prominent model of addiction, the incentive salience theory (IST)<sup>27-29</sup>, posits that wanting becomes dissociated from liking. The latter is hypothesized to be linked to the *experienced* value of the reward and the former to its *anticipated* value<sup>29</sup>. 'Wanting' is typically evoked by predictive cues associated with reward through Pavlovian learning<sup>28</sup>. Learned cues (conditional stimuli) related to addiction acquire incentive salience, reflected in increased BOLD response in the ventral striatum and increased motivated behavior (i.e. shorter reaction times; RTs)<sup>28</sup>. According to the IST, and consistent with observations in substance addictions and gambling disorder<sup>29,30</sup>, increased anticipatory 'wanting' is dissociated from experienced 'liking' in addiction. If PPU subjects share mechanisms of other addictions, we anticipate seeing increased BOLD response in ventral striatum specifically for cues signaling erotic pictures followed by higher motivation to obtain them (measured as shorter RTs) when compared to CSubs. These neural and behavioral measures of increased 'wanting' should be unrelated with measures of 'liking' in PPU subjects, but not in CSubs.

The current study sought to extend prior studies by examining the neural correlates of sexual and non-sexual images in men seeking treatment for PPU and men without PPU. We further sought to relate the brain activations to clinically relevant features of PPU. No prior neuroimaging studies have examined individuals seeking treatment for PPU. Additionally, as it is important to investigate

possible common neural mechanisms of addictions, we investigated cue-induced “*wanting*” of “addiction-related” reward dissociated from its “*liking*”. Most studies using visual sexual stimuli do not allow for determination of whether stimuli may represent cues or rewards,<sup>31,32</sup> and very rarely do they permit comparisons to other incentives, making it difficult to interpret results with respect to the IST<sup>27-29</sup>.

To investigate, we used an incentive delay task (Figure 1) previously used in studies of gambling disorder<sup>30</sup>. This task has three important properties; it: 1) disentangles cue- and reward-related phases related to anticipation and outcome, respectively; 2) allows measurement of neural and behavioral indicators of ‘wanting’ (in a cue phase) and ‘liking’ (in a reward phase); and, 3) provides a possibility to compare “addiction-related” stimuli (in this case erotic pictures) with another potent reward (monetary gains). As individuals with gambling disorder expressed higher ventral striatum responses to monetary cues (compared to erotic) in the cue phase<sup>12</sup>, we hypothesized that men with PPU as compared to those without would demonstrate increased ventral striatal responses for erotic but not monetary cues. We further hypothesized that the degree of ventral striatal activation to erotic cues in the men with PPU would correlate positively with severity of PPU, amount of pornography consumed and frequency of masturbation. Finally according to the IST, we hypothesized that ‘wanting’ in the erotic cue phase would be associated with ‘liking’ in the reward phase in the CSub group but not the PPU group, representing a dissociation between ‘wanting’ and ‘liking’ in PPU.

**Table 1. Characteristics of subjects, PPU symptoms and self-assessment measures collected after qualifications for groups – means (standard deviations)**

|                                                                    | Control Sub (N=24)           | PPU (N=28)                   | p value           |
|--------------------------------------------------------------------|------------------------------|------------------------------|-------------------|
| Age                                                                | 30.49 y.o. (7.55)            | 30.96 y.o. (6.51)            | n.s. <sup>A</sup> |
| Monthly income <sup>B</sup>                                        | 3360 PLN (2264) <sup>C</sup> | 3463 PLN (2491) <sup>C</sup> | n.s. <sup>A</sup> |
| Average pornography consumption per week <sup>D</sup>              | 50.77 min (42.6)             | 287.87 min (258.4)           | <.001             |
| Longest time of pornography consumption in one day <sup>E</sup>    | 70.55 min (52.8)             | 284.74 min (321.3)           | =.002             |
| Average frequency of masturbation per week <sup>D</sup>            | 2.37 (1.46)                  | 5.66 (3.04)                  | <.001             |
| Max number of masturbations in one day                             | 3.10 (1.17)                  | 5.21 (2.75)                  | <.001             |
| Sex Addiction Screening Test –Revised (SAST-R) <sup>33,34</sup>    | 2.67 (2.12)                  | 11.46 (4.95)                 | <.001             |
| Brief Pornography Screener (BPS) <sup>F35</sup>                    | 2.88 (3.24)                  | 5.91 (2.96)                  | =.005             |
| Sexual Arousalability Inventory (SAI) <sup>36,37</sup>             | 83.39 (19.27)                | 88.64 (19.89)                | n.s. <sup>A</sup> |
| Obsessive Compulsive Inventory –Revised (OCI-R) <sup>F38</sup>     | 14.13 (6.73)                 | 15.77 (10.10)                | n.s. <sup>A</sup> |
| UPPS-P Impulsive Behaviour Scale (UPPS-P) <sup>F39,40</sup>        | 130.73 (24.97)               | 131.87 (25.37)               | n.s. <sup>A</sup> |
| Eysenk's Impulsivity Inventory – Impulsivity (IVE-I) <sup>41</sup> | 5.95 (3.85)                  | 6.95 (5.01)                  | n.s. <sup>A</sup> |
| Eysenk's Impulsivity Inventory – Risk Taking (IVE-R) <sup>41</sup> | 9.41 (4.01)                  | 9.9 (3.96)                   | n.s. <sup>A</sup> |
| State-Trait Anxiety Inventory – State (STAI-S) <sup>42,43</sup>    | 33.79 (6.35)                 | 37.69 (9.36)                 | n.s. <sup>A</sup> |
| State-Trait Anxiety Inventory – Trait (STAI-T) <sup>42,43</sup>    | 37.83 (6.96)                 | 43.60 (9.88)                 | =.022             |

<sup>A</sup> Non-significant:  $p > .2$

<sup>B</sup> Income after taxes

<sup>C</sup> 1 PLN is approximately .25 EUR. Average monthly income after taxes in Poland in 2014 was 2865 PLN or about 716 EUR.

<sup>D</sup> Averaged across three self-reports about 8<sup>th</sup>, 4<sup>th</sup> and last week before the fMRI recording (see Figure 1a) as all assessments at the 3 timepoints were highly related to each other within each domain (pornography use measure 1 and 3:  $R = .871$ ;  $p < .01$ , and masturbation:  $R = .792$ ;  $p < .01$ )

<sup>E</sup> Longest time spent on pornography consumption within 24 hour period (one day)

<sup>F</sup> Due to the time needed for development and validation of Polish language version, these questionnaires were added during the study and 16 CSubs and 22 PPU subjects completed them.



## Methods

### Participants

Fifty-seven heterosexual males (age range 18-48 years) participated in the fMRI study. These included thirty-one men seeking treatment for PPU (meeting criteria of hypersexual disorder<sup>13</sup>) and without other psychiatric diagnoses and twenty-six CSUs with comparable ages and incomes, also without psychopathology. Three PPU subjects and two CSUs were excluded from analysis due to extensive head movement (more than 7mm). Characteristics of the remaining 28 PPU subjects and 24 CSUs are presented in Table 1. All participants were financially compensated based on their winnings accumulated during the experimental procedure (M=184.84 PLN; SD=21.66; approximately 46 EUR). To ensure the anonymity of PPU individuals we applied double-blind so research team in the laboratory had no access to the data gathered by team responsible for recruitment and no knowledge who is a PPU subject and who is control. Details of recruitment and anonymity procedures were presented in Supplementary materials. All research procedures were approved by the Ethical Committee of Institute of Psychology, Polish Academy of Science. All subjects provided written informed consent.

### Questionnaire assessments

In self-assessments preceding MRI (Figure 1a), subjects were asked to report their sexual activity during the week (see Table 1). During this phase, we also collected questionnaire measurements for independent verification of screening accuracy and assessment of additional data (as presented in Table 1 and described in details in the Supplementary Materials).

### Incentive delay task

We used the same procedure as in previous studies<sup>12,35,30,44</sup>, schematized in Figure 1b and described in detail in the Supplementary Materials. A modification related to the amount of monetary gains. In the original studies<sup>12,35</sup>, subjects were informed that they would receive a sum of rewards from one

randomly chosen experimental block (out of four)<sup>30</sup>. In our study, subjects were told they would receive the exact sum of all monetary gains (M=184.84 PLN, which was approximately 5.5% of monthly salary after taxes).

### **MRI data acquisition**

MRI data acquisition was conducted at the Laboratory of Brain Imaging, Neurobiology Center, Nencki Institute of Experimental Biology on a 3-Tesla MR scanner (Siemens Magnetom Trio TIM, Erlangen, Germany) equipped with 12-channel phased array head coil. Functional data were acquired using a T2\*-weighted gradient echo planar imaging (EPI) sequence with the following parameters: repetition time = 2500ms, echo time = 28ms, flip angle = 90°, in plane resolution = 64 × 64 mm, field of view = 224 mm, and 35 axial slices with 3.5 mm slice thickness with no gap between slices. Each of the four functional runs consisted of 286 volumes. Field mapping was done based on prior methodology<sup>45</sup> using double echo FLASH (echo time 1=4.92 ms echo time 2=7.38 ms time repetition = 600 ms) with the same spatial properties as the functional scans. Detailed anatomical data were acquired with a T1-weighted sequence (repetition time = 2530 ms, echo time = 3.32 ms). Head movements were minimized with cushions placed around the participants' heads. Subjects were asked to refrain from any psychoactive substance use and sexual activity during 24 hours preceding fMRI.

### **fMRI Analysis**

Statistical Parametric Mapping (SPM12, Wellcome Trust Center for Neuroimaging, London, UK) running on MATLAB R2013b (The Math-Works Inc., Natick, MA, USA) was used for data preprocessing and statistical analyses. In order to minimize geometrical distortions in EPI images caused by field inhomogeneities, we used additional B0 field map scans. During the initial step, the FieldMap toolbox<sup>45</sup> was used to calculate voxel displacement maps. Then functional images were motion-corrected and un-warped using these displacement maps<sup>46</sup>. Next, the structural images (T1) from single subjects were co-registered to the mean functional image. T1 scans were automatically classified into grey matter, white matter and cerebrospinal fluid using the "New Segmentation" tool

based on a mixture of Gaussian models and tissue probability maps<sup>47</sup>. High-dimensional diffeomorphic anatomical registration through exponentiated lie algebra (DARTEL) was used to create a study-specific template and flow fields based on the segmented tissue from the T1 images<sup>48</sup>. The functional images were normalized to a 2 mm isotropic voxel size using compositions of flow fields and study-specific template<sup>49</sup>. Finally, the normalized functional images were smoothed with an 8 mm isotropic Gaussian kernel. In the first-level statistical analysis, all of the experimental conditions and head movement parameters were entered into the design matrix. The data were modeled using the canonical hemodynamic response function provided with SPM12. Data were also high-pass filtered (128 sec) to remove low-frequency signals, and an AR(1) model was applied to adjust for serial correlations in the data. Brain responses during the cue anticipatory phase and the reward outcome phase were modelled in line with previous studies<sup>30,44</sup> and described in details in the Supplementary Materials.

### **Regions of interests**

We used a striatal ROI defined *a priori* based on our previous study in subjects with gambling disorder<sup>30</sup> (8mm spheres centered around: Left: x=-12, y=10 z=-6, Right: x=12, y=10, z=-4 ). To focus on our hypothesis and keep this manuscript concise, we present only analyses using the *a priori* defined ROI of the ventral striatum. For control purposes, we also defined an ROI in Heschl's gyrus based on the corresponding mask in the AAL atlas taken from the WFU PickAtlas toolbox (version 3.0.5). The percent signal change was calculated with the MarsBaR toolbox (<http://marsbar.sourceforge.net>). Due to the very similar effects for left and right ROIs, we present only results averaged across hemispheres.

### **Statistical analysis**

For statistical analysis IBM SPSS 22 (IBM Corp. Released 2013, Armonk, NY: IBM Corp), and MATLAB R2014a (The Math-Works Inc., Natick, MA, USA) were used. Due to high correlations across-time (at

the three time points: 8 weeks, 4 weeks and 1 day before the fMRI) within self-assessed pornography use ( $R=.871$ ;  $p<.01$ ) and masturbation ( $R=.792$ ;  $p<.01$ ), we computed average scores across time for each variable (Figure 1a; Table 1). For testing group-by-trial-type interactions and main effects of group and trial type in BOLD signal from the ROIs, General Linear Models (GLMs) and Fisher's F tests (ANOVA with trial type as a within-subject factor and group as a between subject factor) were used (Figure 2). All *post hoc* comparisons were conducted with Bonferroni-Holms correction. Correlations between BOLD signal and measures of symptoms were computed only for measures significantly differentiating PPU subjects from CSubs (SAST-R, BPS, amount of pornography use and masturbation). Due to the discrete thresholding of SAST-R scores and skewedness of distributions of the three other measures, Spearman's Rho was used to compute covariance. We also examined BOLD activity in a "control ROI": Heschl's gyrus, where according to our predictions, no group or condition differences were observed.

## Results

### Between-group differences

Men seeking treatment for PPU and CSubs did not differ in age, income, impulsivity or compulsivity (Table 1). Although no subjects met criteria for anxiety disorders, men with PPU as compared with CSubs exhibited higher trait anxiety ( $t(50)=2.37$ ;  $p=.022$ ; STAI-T). No difference in self-declared sexual arousability (SAI) was observed; however, men with PPU as compared with CSubs showed higher sexual arousability for compensatory activities such as pornography use and masturbation on the corresponding SAI subscale ( $t(46)=3.348$ ;  $p=.002$ ).

As anticipated, men with PPU as compared with CSubs demonstrated higher scores on the Sex Addiction Screening Test –Revised ( $t(50)=8.539$ ;  $p<.001$ ) and Pornography Craving Screening Test

( $t(36)=2.998$ ;  $p=.005$ ) and reported more pornography use ( $t(50)=3.776$ ;  $p<.001$ ) and more frequent masturbation ( $t(50)=5.042$ ;  $p<.001$ ) during the weeks preceding fMRI.

### **Behavioral results**

A significant interaction between group and incentive type in RTs was observed ( $F(1,50)=5.112$ ;  $p=.028$ ). The shortest RTs were observed in men with PPU during erotic trials (Fig. 2a). No differences were observed in hedonic value ratings (Fig. 2c). To examine for potential dissociation between behavioral measures of 'wanting' (RTs) and 'liking' (hedonic ratings), we investigated a three-way interaction between condition (monetary vs erotic), group (CSubs vs PPU) and measure (RT vs hedonic values). This interaction was significant ( $F(1,50)=5.137$ ;  $p=.028$ ), showing that despite the behavioral preference (shorter RTs) for erotic trial in the cue phase among PPU subjects when compared to CSubs, both groups do not differ in the reward phase (hedonic ratings). This result indicates dissociation between behavioral measures of 'wanting' (RTs) and 'liking' (hedonic ratings) of erotic stimuli in PPU subjects, but not in CSubs. Interestingly, although overall levels of accuracy in the experimental procedure were largely comparable between men with PPU and CSubs ( $t(50)=1.627$ ;  $p=.11$ ), the PPU group demonstrated less accuracy than CSubs on control (non-rewarded) trials ( $t(50)=2.084$ ;  $p=.045$ ; Fig. 2b).

### **Neuroimaging results**

Like with RTs, cue-related reactivity of the ventral striatum demonstrated a group x incentive interaction ( $F(1,50)=6.886$ ;  $p=.011$ ; Fig 2d). Men with PPU and CSubs differed significantly in reactivity for erotic ( $t(50)=2.624$ ;  $p=.011$ ) but not monetary ( $t(50)=.047$ ;  $p=.963$ ) cues. During the reward processing phase, no between-group differences were observed ( $F(1,50)=.061$ ;  $p=.806$ ). A main effect of incentive type was observed ( $F(1,50)=44.308$ ;  $p<.001$ ). Erotic rewards evoked significantly stronger reactivity than monetary rewards. We also examined the three-way interaction between group, incentive type and processing phase (cue vs reward), which was significant ( $F(1,50)=5.438$ ;  $p=.024$ ). Despite stronger activations of the ventral striatum for erotic versus

monetary cues in PPU subjects and CSubs in the reward phase, no between-group differences were found in response to erotic cues. This result speaks in favor of a dissociation between neuronal measures of 'wanting' (RTs) and 'liking' (hedonic ratings) of erotic stimuli in PPU subjects, but not in CSubs.

### **Relationships between behavioral and neuroimaging results and clinical features of PPU**

In line with previous work<sup>30,50</sup>, we computed for each subject the differential reactivity to monetary versus erotic cues by subtracting the corresponding striatal BOLD responses. We also calculated a relative-motivation index measured as the difference in mean RTs for monetary and erotic trials. The brain-behavior correlation between these two measures was strongly significant ( $R=.76$ ;  $p<.0001$ , Fig. 3a). Next, we examined how individual differences in ventral striatal reactivity for erotic versus monetary cues related to four measures differentiating both groups (Table 1): severity of CSB symptoms measured with the SAST-R ( $Rho=.31$ ;  $p=.01$ ; Fig. 3b), pornography craving measured with the BPS ( $Rho=.264$ ;  $p=.055$ ), amount of pornography consumption ( $Rho=.305$ ;  $p=.015$ ; Fig. 3c) and number of masturbations per week ( $Rho=.296$ ;  $p=.018$ ; Fig. 3d). Bonferroni-Holms correction for multiple comparisons was used.

In the next step, we checked if an analogous index of liking would be related to behavioral measures. For this purpose, we calculated an individual relative-liking index measured as differences in ventral striatal reactivity for erotic and monetary rewards. We related this index to individual differences in ratings of rewards' hedonic values and the same four measures differentiating both groups as above. No correlations were significant.

### **Discussion**

Our results, in line with the IST<sup>27-29</sup>, indicate that men seeking treatment for PPU when compared to CSubs show increased ventral striatal reactivity for cues predicting erotic pictures (but not for cues predicting monetary gains). Such increased striatal reactivity for cues predicting erotic content is

followed by higher motivation (reflected in shorter RTs) to view erotic rewards (Figure 2d, 2a and 3a). Consistently with the IST<sup>27,29</sup>, these results show increased ‘wanting’ evoked specifically by an initially neutral cue predictive for erotic rewards. Also as predicted by the IST, both neural (BOLD response) and behavioral (RTs) indicators of ‘wanting’ were dissociated from measures of ‘liking’ among PPU, but not in CSubs, and this was reflected in three-way interactions between condition (monetary vs erotic), group (CSubs vs PPU), and experimental phase (cue vs reward). In other words, subjects who seek treatment for PPU expressed higher motivational behavior for pornography cues predictive of erotic content. This motivated behavior (‘wanting’ - probably related to the expectation of highly rewarding value of pornography) is dissociated from actual ‘liking’ - PPU subjects did not differ from CSubs in BOLD response for erotic pictures (reward phase) or hedonic values ratings (Figure 2c and 2e). Moreover, for the differential striatal reactivity to erotic versus monetary cues (but not rewards) was related not only to indicators of motivated behaviors during the study (RTs; Figure 3a), but also to severity of CSB (measured with the SAST-R; Figure 3b), as well as to the amount of pornography consumption and frequency of masturbation (Figure 3c and 3d) reported during the 2 months preceding fMRI.

This pattern of increased cue-related ‘wanting’ dissociated from reward-related ‘liking’ resembles findings in addictions<sup>29,30</sup>. Specific cues (predictive for addiction-related rewards) evoke activations of brain-reward systems associated with striatal responses<sup>27,51-53</sup> and motivation to approach reward, but experienced hedonic value<sup>28,29</sup> or striatal response for reward<sup>53</sup> are not proportional to ones evoked by the preceding cue. It may suggest impaired mechanism of updating cue-related predictions about expected values of erotic stimuli, similar to mechanisms proposed for substance-use disorders<sup>54,55</sup>. Given the role of the ventral striatum in reward anticipation<sup>56</sup>, initially neutral stimuli (akin to cues introduced in our experimental procedure) may become for men with PPU powerful incentives influencing motivational values of alternative sources of reward, eventually leading to pornography use. However, longitudinal studies are needed to examine this hypothesis.

Our results show that PPU is related to alterations in motivational processes. Besides increased striatal response for cues predicting erotic rewards and accompanied increase of motivated behavior, men with PPU exhibited also a decrease of motivated behaviors for non-rewarded trials (lower accuracy, fig 2b) when compared to men without PPU. This finding raises questions whether men with PPU may have more generalized impairments of reward processing, in line with a reward deficiency syndrome theory<sup>57</sup>, which would predict decreased striatal reactivity and accompanied hedonic values for both types of rewards (erotic and monetary) in the reward phase. Here we show that this is not the case – men with and without PPU do not differ in striatal reactivity and hedonic values either for erotic or monetary rewards. The key difference between these two groups is in striatal reactivity (and accompanied behavioral reactions) in response for cues.

Interestingly, the findings indicate that increased cue-reactivity among men with PPU is not a general dysfunction, but is related to cues predictive of erotic but not monetary rewards. This selective mechanism of increased reactivity for erotic but not monetary cues among men with PPU speaks in favor of the ST<sup>27</sup> rather than more generalize impairments of reward processing proposed in example by theoretical frameworks such as the reward deficiency syndrome<sup>57</sup>. However, it is important to note that we were excluding all subjects with comorbid disorders and/or addiction (approximately 50% of treatment-seeking individuals were excluded for this reason during the initial screening procedure), so our conclusion about a lack of generalized reward processing impairment may not generalize to men with PPU and comorbid disorders. Despite this limitation, the exclusion of individuals with PPU and co-occurring psychiatric disorders permitted for a more focused study on mechanisms underlying PPU and exclude possible effects of psychopathology. Additional limitations include the exclusion of women, and future studies should examine the extent to which the findings extend to women with PPU. Additionally, future studies should examine how neurobiological and clinical measures might relate to treatment outcomes for individuals with PPU.

## Conclusions



PPU subjects showed increased activation of the ventral striatum specifically for cues predicting erotic pictures but not for cues predicting monetary gains. In PPU subjects, this brain activation was accompanied by measures suggesting increased behavioral motivation to view erotic images (higher ‘wanting’). Ventral striatal reactivity for cues signaling erotic pictures (but not for erotic pictures *per se*) was significantly related to severity of CSB, amount of pornography use per week and frequency of masturbation. The findings suggest similarities between PPU and addictions and an important role for learned cues in PPU. Identifying PPU-related triggers and targeting the dissociation of learned cues from problematic behaviors may be useful in the treatment of PPU. Future studies should examine specific treatments, as well as determine the prevalence and clinical correlates of PPU, and identify predisposing factors for PPU.

## A: Data collection

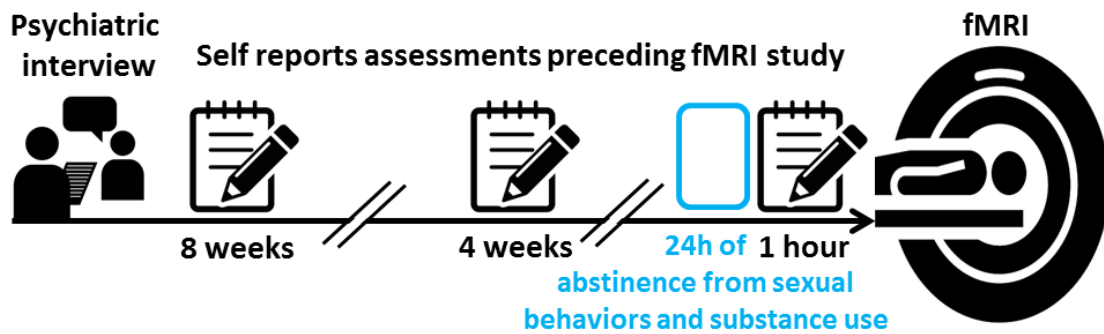

## B: Procedure

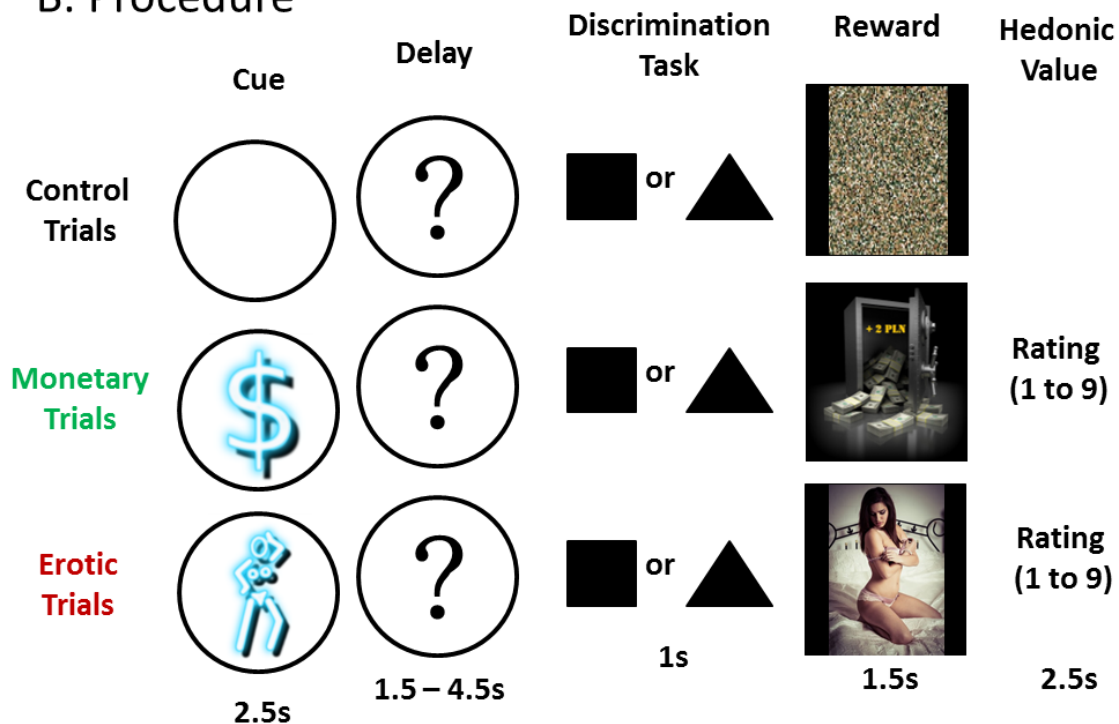

**Figure 1. Data collection and experimental procedure.** **A:** After psychiatric assessment, subjects who met study criteria (see Methods) completed questionnaires assessing self-reported sexual behavior and substance use in the weeks preceding fMRI. **B:** Incentive delay task used in the fMRI session. Subjects first saw a cue informing them about the type of an upcoming reward. Then, after the delay period (question mark), participants had to perform a target discrimination task within a maximum time of 1s. The target was either a triangle (left button press required) or a square (right button press required). The subsequent outcome depended on the participants' performance, and reaction times were thus used as an index of their motivation. In rewarded trials, subjects saw a monetary amount displayed on a safe picture (1-8 PLN, approximately: 0.25 - 2 EUR) or an erotic picture, and had to provide a hedonic rating on a continuous scale (1-don't like it : 9-like it very much). After accurate reactions in the discrimination task, rewards were delivered with 50% probability (reward was always relevant with cue). In non-rewarded and control trials, subjects saw a scrambled picture. All monetary gains were paid to the participants at the end of the experiment. Both groups had similar accuracy for monetary and erotic trials (Figure 2b) and obtained similar amounts of monetary wins (CSubs: M=187.41 PLN; SD=22.83, PPU subjects: M=182.14 PLN; SD=20.56) approximating 5.5% of an average monthly salary in Poland. Credits of Sample photo: Lies Thru a Lens, CC BY 2.0. For license terms see: CC BY 2.0 ().

**Behavioral results:**

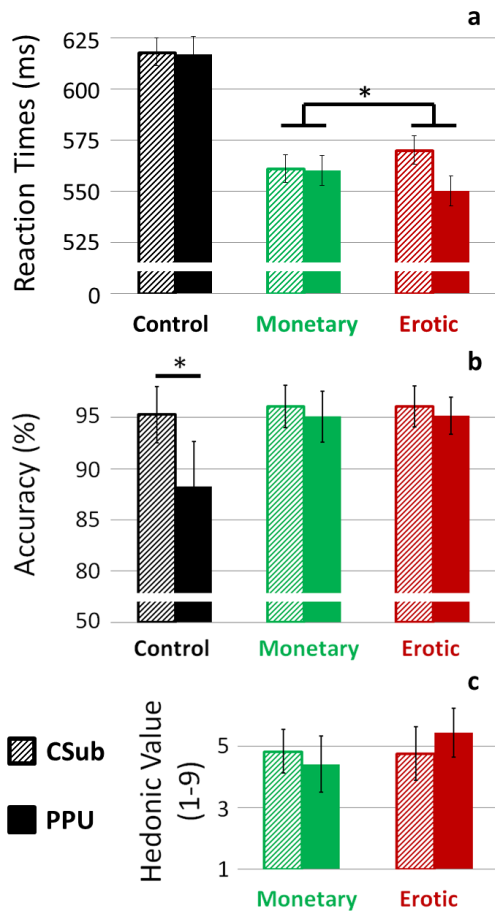

**Ventral striatum reactivity:**

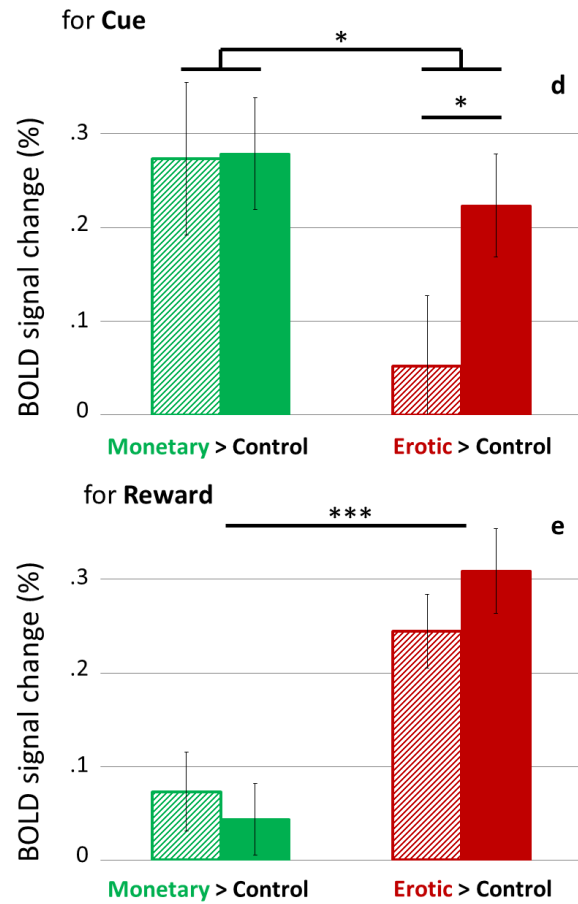

**Figure 2. Behavioral and neuroimaging results.** **A:** Comparison of RTs in the discrimination task (see Figure 1b). **B:** Comparison of accuracy. **C:** Comparison of hedonic value ratings (see Figure 1b). **D:** Comparison of BOLD signal response in the ventral striatum for cue presentation (BOLD signal averaged across 2 *a priori* defined regions of interests in the left and right brain hemisphere: 8mm spheres centered around: Left:  $x=-12, y=10, z=-6$  Right:  $x=12, y=10, z=-4$ ). **E:** Comparison of BOLD signal response in the ventral striatum for reward presentation. All post-hoc tests were done with Bonferroni correction for multiple comparisons. Error bars indicates SEM. \* $p < .05$ ; \*\* $p < .01$ ; \*\*\* $p < .001$ .

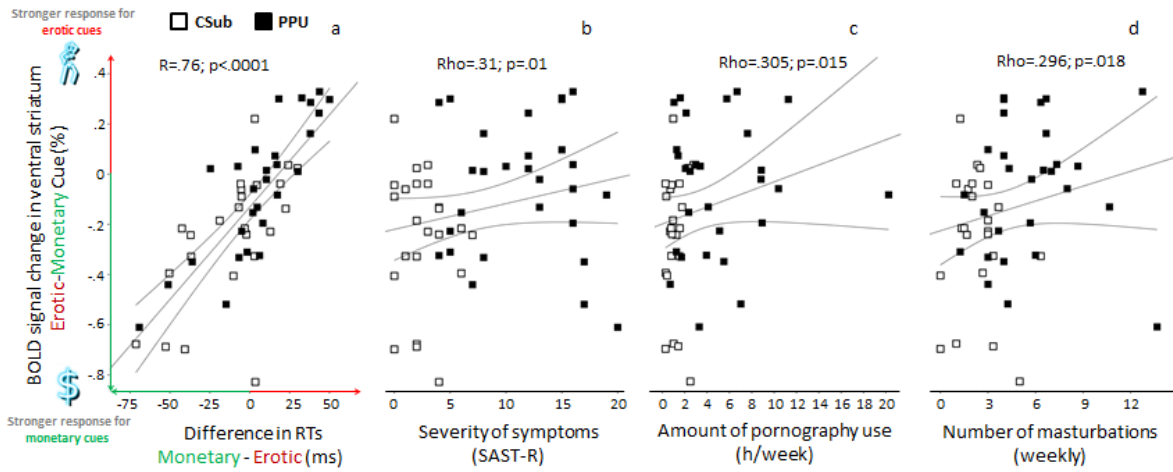

**Figure 3. Correlations of ventral striatal cue-reactivity with behavioral and clinical features of PPU.** The correlations between differential striatal reactivity to monetary versus erotic cues and **A:** relative-motivation index measured as difference between RTs for monetary - erotic trials; **B:** severity of CSB measured by the Sexual Addictions Screening Test – Revised (20 points scale, which was not used at recruitment phase); **C:** average amount of pornography consumption per week, and **D:** frequency of masturbation per week. Error lines depicts 95% confidence intervals. Bonferroni-Holms correction was used for multiple comparisons.

**Acknowledgements.** We are grateful to all *Participants* who agreed to take a part in this study; M. Skorko and the VR Lab (<http://vrlab.edu.pl/>) for the possibility of using the GEx platform to collect the questionnaire data; P. Winkielman, J. Rapela, E. Kowalewska, M. Bielecki, P. Holas, Ł. Okruszek, Ł. Głowacki and D. Baran for help and comments. This study was supported by the Polish National Science Centre, OPUS grant, number 2014/15/B/HS6/03792 (M. Gola). M. Gola is also supported by Polish Ministry of Science scholarships (1057/MOB/2013/0 and 469/STYP/10/2015) and scholarship Start of Foundation for Polish Science. M. Potenza is supported by CASAColumbia and the National Center for Responsible Gaming. The views presented in the article do not necessarily reflect those of the funding agencies and rather reflect those of the authors.

**Authors Contributions.** M.G., G.S., A.M designed the project. M.G., G.S. and B.K. prepared experimental procedures. M.G. and M.L-S., recruited subjects and collected clinical data. M.Wo. conducted the experiments. M.G., M.Wo., B.K., M.Wy., J.R. and A.M performed the statistical analysis. M.G., G.S., M.P. and M.Wo analyzed the findings. M.G., G.S. and M.P. wrote the manuscript.

**Disclosures.** The authors report no conflicts of interest with respect to the content of this manuscript. Dr. Potenza has consulted for and advised Ironwood, Lundbeck, INSYS, Shire, RiverMend Health and Opiant/Lakelight Therapeutics; has received research support from Mohegan Sun Casino, the National Center for Responsible Gaming, and Pfizer; has participated in surveys, mailings or telephone consultations related to drug addiction, impulse-control disorders or other health topics; has consulted for gambling and legal entities on issues related to impulse-control and addictive disorders; provides clinical care in the Connecticut Department of Mental Health and Addiction Services Problem Gambling Services Program; has performed grant reviews for the National Institutes of Health and other agencies; has edited journals or journal sections; has given academic lectures in grand rounds, CME events and other clinical or scientific venues; and has generated books or book chapters for publishers of mental health texts.

## Bibliography

1. Luscombe, B. Porn and the threat to virility. *Time* 40–47 (2016).
2. Hald, G. M. Gender differences in pornography consumption among young heterosexual Danish adults. *Arch Sex Behav* **35**, 577–585 (2006).
3. Sabina, C., Wolak, J. & Finkelhor, D. The nature and dynamics of internet pornography exposure for youth. *Cyberpsychol Behav* **11**, 691–693 (2008).
4. Opinium Research. 500 Online Interviews amongst UK adults aged 18. Institute for Public Policy Research, UK (2014).
5. Gola, M., Lewczuk, K. & Skorko, M. What Matters: Quantity or Quality of Pornography Use? Psychological and Behavioral Factors of Seeking Treatment for Problematic Pornography Use. *J Sex Med* **13**, 815–824 (2016).
6. Smith, P. H. et al. Compulsive sexual behavior among male military veterans: prevalence and associated clinical factors. *Journal of behavioral addictions* **3**, 214–222 (2014).
7. Kor, A., Fogel, Y., Reid, R. C. & Potenza, M. N. Should Hypersexual Disorder be Classified as an Addiction? *Sex Addict Compulsivity* **20**, (2013).
8. Kafka, M. P. What happened to hypersexual disorder? *Arch Sex Behav* **43**, 1259–1261 (2014).
9. Ley, D., Prause, N. & Finn, P. The Emperor Has No Clothes: A Review of the “Pornography Addiction” Model. *Curr Sex Health Rep* **6**, 94–105 (2014).
10. Kraus, S. W., Voon, V. & Potenza, M. N. Should compulsive sexual behavior be considered an addiction? *Addiction* (2016). doi:10.1111/add.13297
11. Holden, C. Behavioral ‘addictions: do they exist? *Science* **294**, 980–982 (2001).
12. American Psychiatric Association. *Diagnostic and Statistical Manual of Mental Disorders (DSM-5®)*. (American Psychiatric Pub., 2013).
13. Kafka, M. P. Hypersexual disorder: a proposed diagnosis for DSM-V. *Arch Sex Behav* **39**, 377–400 (2010).
14. Reid, R. C. et al. Report of findings in a DSM-5 field trial for hypersexual disorder. *J Sex Med* **9**, 2868–2877 (2012).
15. Krueger, R. B. Diagnosis of hypersexual or compulsive sexual behavior can be made using ICD-10 and DSM-5 despite rejection of this diagnosis by the American Psychiatric .... *Addiction* (2016). at <<http://onlinelibrary.wiley.com/doi/10.1111/add.13366/full>>
16. Stein, D. J., Andersen, E. W., Tonnoir, B. & Fineberg, N. Escitalopram in obsessive-compulsive disorder: a randomized, placebo-controlled, paroxetine-referenced, fixed-dose, 24-week study. *Curr Med Res Opin* **23**, 701–711 (2007).

17. Gola, M. & Potenza, M. N. Paroxetine Treatment of Compulsive Pornography Consumption – A Case Series. *Journal of behavioral addictions* (2016).
18. Maisel, N. C., Blodgett, J. C., Wilbourne, P. L., Humphreys, K. & Finney, J. W. Meta-analysis of naltrexone and acamprosate for treating alcohol use disorders: when are these medications most helpful? *Addiction* **108**, 275–293 (2013).
19. Bartley, C. A. & Bloch, M. H. Meta-analysis: pharmacological treatment of pathological gambling. *Expert Rev Neurother* **13**, 887–894 (2013).
20. Bostwick, J. M. & Bucci, J. A. Internet sex addiction treated with naltrexone. *Mayo Clin Proc* **83**, 226–230 (2008).
21. Kraus, S. W., Meshberg-Cohen, S., Martino, S., Quinones, L. & Potenza, M. Treatment of Compulsive Pornography Use with Naltrexone: A Case Report. *The American Psychiatry Journal* (2015).
22. Thompson, A. C. et al. Kappa-opioid receptor activation modifies dopamine uptake in the nucleus accumbens and opposes the effects of cocaine. *J Neurosci* **20**, 9333–9340 (2000).
23. Kühn, S. & Gallinat, J. Brain structure and functional connectivity associated with pornography consumption: the brain on porn. *JAMA Psychiatry* **71**, 827–834 (2014).
24. Brand, M., Snagowski, J., Laier, C. & Maderwald, S. Ventral striatum activity when watching preferred pornographic pictures is correlated with symptoms of Internet pornography addiction. *Neuroimage* **129**, 224–232 (2016).
25. Voon, V. et al. Neural correlates of sexual cue reactivity in individuals with and without compulsive sexual behaviours. *PLoS ONE* **9**, e102419 (2014).
26. Klucken, T., Wehrum-Osinsky, S., Schweckendiek, J., Kruse, O. & Stark, R. Altered Appetitive Conditioning and Neural Connectivity in Subjects With Compulsive Sexual Behavior. *J Sex Med* (2016). doi:10.1016/j.jsxm.2016.01.013
27. Robinson, T. E. & Berridge, K. C. The neural basis of drug craving: an incentive-sensitization theory of addiction. *Brain Res Brain Res Rev* **18**, 247–291 (1993).
28. Berridge, K. C. From prediction error to incentive salience: mesolimbic computation of reward motivation. *Eur J Neurosci* **35**, 1124–1143 (2012).
29. Robinson, M., Fischer, A. M., Ahuja, A., Lesser, E. N. & et al. Roles of “Wanting” and “Liking” in Motivating Behavior: Gambling, Food, and Drug Addictions. (2015). at <[http://link.springer.com/chapter/10.1007/7854\\_2015\\_387](http://link.springer.com/chapter/10.1007/7854_2015_387)>
30. Sescousse, G., Barbalat, G., Domenech, P. & Dreher, J. C. Imbalance in the sensitivity to different types of rewards in pathological gambling. *Brain* **136**, 2527–2538 (2013).
31. Gola, M., Wordecha, M., Marchewka, A. & Sescousse, G. Visual sexual stimuli –rewards rather than cues. A key to studies on out of control sexual behaviors. *Front Hum Neurosci* (2016).

32. Gola, M. *Decreased LPP for sexual images in problematic pornography users may be consistent with addiction models. Everything depends on the model. Biol Psychol* (2016).
33. Carnes, P., Green, B. & Carnes, S. *The same yet different: Refocusing the Sexual Addiction Screening Test (SAST) to reflect orientation and gender. Sexual Addiction & Compulsivity* (2010). at <<http://www.tandfonline.com/doi/abs/10.1080/10720161003604087>>
34. Gola, M. et al. *Polish adaptation of Sexual Addiction Screening Test - Revised. Polish Psychiatry* (2015).
35. Kruas, S. *Brief Pornography Screener. (2016).*
36. Hoon, E. F., Joon, P. W. & Wincze, J. P. *An inventory for the measurement of female sexual arousability: the SAI. Arch Sex Behav* **5**, 269–274 (1976).
37. Gola, M., Kowalewska, E., Wierzba, M., Wordecha, M. & Marchewka, A. *Polish adaptation of the Sexual Arousability Inventory SAI-PL and validation for males. Psychiatria* (2015).
38. Foa, E. B., Huppert, J. D., Leiberg, S., Langner, R. & et al. *The Obsessive-Compulsive Inventory: development and validation of a short version. Psychological ...* (2002). at <<http://psycnet.apa.org/journals/pas/14/4/485/>>
39. Whiteside, S. P. & Lynam, D. R. *Understanding the role of impulsivity and externalizing psychopathology in alcohol abuse: application of the UPPS impulsive behavior scale. Exp Clin Psychopharmacol* **11**, 210–217 (2003).
40. Golińska, L. in *Wyzwania psychologii biznesu w wymiarze międzykulturowym. (ed. Skłodowski, H.) (Wydawnictwo Społecznej Akademii Nauk, 2015).*
41. Jaworowska, A. *IVE–Kwestionariusz Impulsywności. Pracownia Testów Psychologicznych* (2011).
42. Spielberger, C. D. *State-Trait anxiety inventory. (2010).* at <<http://onlinelibrary.wiley.com/doi/10.1002/9780470479216.corpsy0943/full>>
43. Sosnowski, T. & Wrześniewski, K. *Polska adaptacja inwentarza STAI do badania stanu i cechy lęku. Przegląd Psychologiczny* 393–412 (1983).
44. Sescousse, G., Redouté, J. & Dreher, J. C. *The architecture of reward value coding in the human orbitofrontal cortex. J Neurosci* **30**, 13095–13104 (2010).
45. Jezzard, P. & Balaban, R. S. *Correction for geometric distortion in echo planar images from B0 field variations. Magn Reson Med* **34**, 65–73 (1995).
46. Andersson, J. L., Hutton, C., Ashburner, J., Turner, R. & Friston, K. *Modeling geometric deformations in EPI time series. Neuroimage* **13**, 903–919 (2001).
47. Ashburner, J. & Friston, K. J. *Unified segmentation. Neuroimage* **26**, 839–851 (2005).
48. Ashburner, J. *A fast diffeomorphic image registration algorithm. Neuroimage* **38**, 95–113 (2007).



49. Marchewka, A. et al. Influence of magnetic field strength and image registration strategy on voxel-based morphometry in a study of Alzheimer's disease. *Hum Brain Mapp* **35**, 1865–1874 (2014).
50. Sescousse, G., Li, Y. & Dreher, J. C. A common currency for the computation of motivational values in the human striatum. *Soc Cogn Affect Neurosci* **10**, 467–473 (2015).
51. Oei, N. Y., Rombouts, S. A., Soeter, R. P., van Gerven, J. M. & Both, S. Dopamine modulates reward system activity during subconscious processing of sexual stimuli. *Neuropsychopharmacology* **37**, 1729–1737 (2012).
52. Smith, K. S., Berridge, K. C. & Aldridge, J. W. Disentangling pleasure from incentive salience and learning signals in brain reward circuitry. *Proc Natl Acad Sci U S A* **108**, E255–E264 (2011).
53. Flagel, S. B. et al. A selective role for dopamine in stimulus-reward learning. *Nature* **469**, 53–57 (2011).
54. Tanabe, J. et al. Reduced neural tracking of prediction error in substance-dependent individuals. *Am J Psychiatry* **170**, 1356–1363 (2013).
55. Parvaz, M. A. et al. Impaired neural response to negative prediction errors in cocaine addiction. *J Neurosci* **35**, 1872–1879 (2015).
56. Balodis, I. M. & Potenza, M. N. Anticipatory reward processing in addicted populations: a focus on the monetary incentive delay task. *Biol Psychiatry* **77**, 434–444 (2015).
57. Comings, D. E. & Blum, K. Reward deficiency syndrome: genetic aspects of behavioral disorders. *Prog Brain Res* **126**, 325–341 (2000).
